# Supplementary material for: Interfacial oxygen-scavenging-driven formation of atomic-layer-deposited MoO 2 on MoN x electrodes for improved TiO 2 capacitor performance
Source: Royal Society of Chemistry journal article supplement (doi:10.1039/d5tc04067a), 2026-01-01
Supplement: d5tc04067a1.pdf [file d5tc04067a1.pdf]

## Supporting Information

# Interfacial oxygen-scavenging-driven formation of atomic-layer-deposited MoO<sub>2</sub> on MoN<sub>x</sub> electrodes for improved TiO<sub>2</sub> capacitor performance

*Wangu Kang, Jae Hyeon Lee, and Jeong Hwan Han\**

Department of Materials Science and Engineering, Seoul National University of Science and  
Technology, Seoul 01811, Republic of Korea.

KEYWORDS: MoO<sub>2</sub>; Atomic Layer Deposition; Oxygen-scavenging; TiO<sub>2</sub>; DRAM  
capacitor

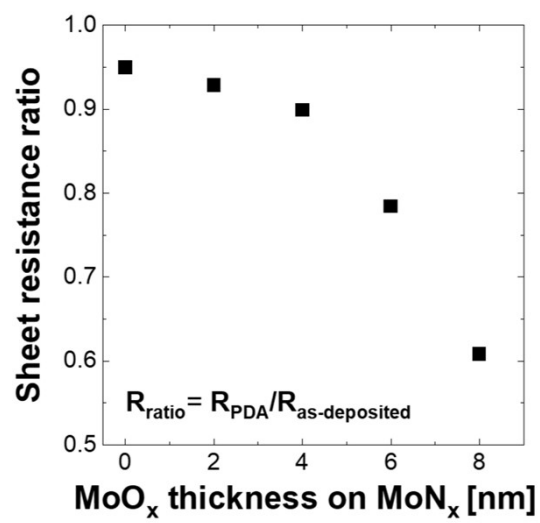

**Figure S1.** Sheet resistance ratio of the MoO<sub>x</sub>/MoN<sub>x</sub> stack before and after PDA as a function of MoO<sub>x</sub> thickness.

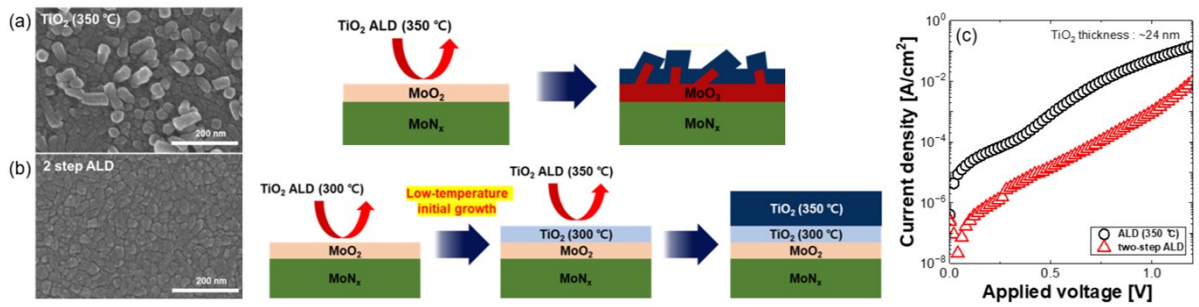

**Figure S2.** FESEM images and schematic illustration of (a) smooth TiO<sub>2</sub> and (b) rough TiO<sub>2</sub> surfaces depending on the ALD TiO<sub>2</sub> process conditions. A smooth TiO<sub>2</sub> surface was obtained via a two-step ALD process (300 → 350 °C), whereas rod-like surface structures were observed after high-temperature (350 °C) ALD, attributed to the oxidation of the underlying MoO<sub>x</sub> layer. (c) Leakage current density of ALD TiO<sub>2</sub> films on MoO<sub>x</sub>/MoN<sub>x</sub> bottom electrodes depending on the ALD TiO<sub>2</sub> process condition.

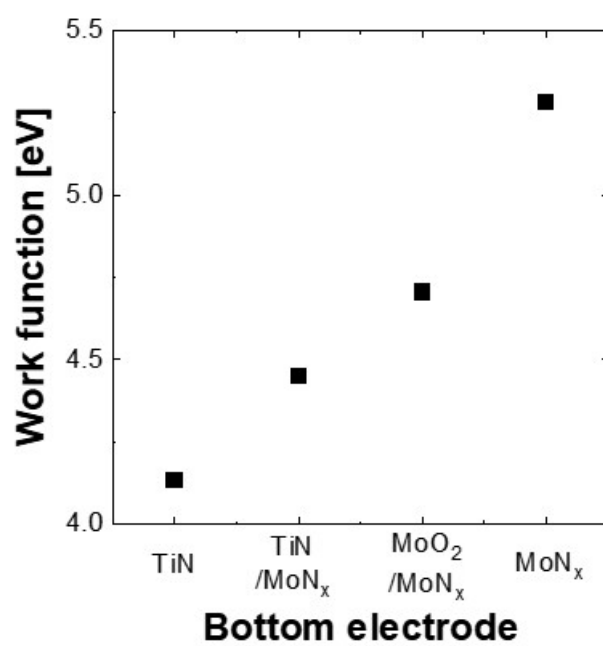

**Figure S3.** Comparison of the work functions of MoN<sub>x</sub>, 2-nm-thick MoO<sub>2</sub>/MoN<sub>x</sub>, 2-nm-thick TiN/MoN<sub>x</sub>, and TiN electrodes measured by ultraviolet photoelectron spectroscopy
